# Supplementary material
Source: Elsevier journal article supplement (https://www.sciencedirect.com/science/article/pii/S1575181320300103)
Supplement: mmc1 [file S1575181320300103:mmc1.pdf]

## ANEXO

### Anexo 1. Cuestionario sobre automedicación<sup>10</sup>.

---

|                                                                                                                                                                                                                                                                                                                                                                                                       |                                                                                                                                                                                                                                                                    |
|-------------------------------------------------------------------------------------------------------------------------------------------------------------------------------------------------------------------------------------------------------------------------------------------------------------------------------------------------------------------------------------------------------|--------------------------------------------------------------------------------------------------------------------------------------------------------------------------------------------------------------------------------------------------------------------|
| 1. Sexo.                                                                                                                                                                                                                                                                                                                                                                                              | 7. Motivos/causas de la automedicación                                                                                                                                                                                                                             |
| <ul style="list-style-type: none"> <li>• Hombre</li> <li>• Mujer</li> </ul>                                                                                                                                                                                                                                                                                                                           | <ul style="list-style-type: none"> <li>• Levedad de los síntomas</li> <li>• Poseer suficiente conocimiento</li> <li>• Confianza</li> <li>• Falta de tiempo para asistir a consulta médica</li> <li>• Experiencia previa con el fármaco</li> <li>• Otros</li> </ul> |
| 2. Curso.                                                                                                                                                                                                                                                                                                                                                                                             | 8. Fuente de información consultada                                                                                                                                                                                                                                |
| <ul style="list-style-type: none"> <li>• 4º Enfermería</li> <li>• 4º Fisioterapia</li> <li>• 6º Medicina</li> </ul>                                                                                                                                                                                                                                                                                   | <ul style="list-style-type: none"> <li>• Derivada del grado</li> <li>• Médico</li> <li>• Prospecto</li> <li>• Familiar/vecino/amigo</li> <li>• Farmacéutico</li> <li>• Otro profesional</li> <li>• Aviso publicitario</li> <li>• Búsqueda en internet</li> </ul>   |
| 3. ¿Te automedicas?                                                                                                                                                                                                                                                                                                                                                                                   | 9. Percepción de la eficacia                                                                                                                                                                                                                                       |
| <ul style="list-style-type: none"> <li>• Sí</li> <li>• No</li> </ul>                                                                                                                                                                                                                                                                                                                                  | <ul style="list-style-type: none"> <li>• Muy buena</li> <li>• Buena</li> <li>• Ninguna</li> <li>• Reacción adversa</li> </ul>                                                                                                                                      |
| 4. Número de fármacos consumidos                                                                                                                                                                                                                                                                                                                                                                      | 10. Fuente de obtención de fármacos                                                                                                                                                                                                                                |
| <ul style="list-style-type: none"> <li>• 1</li> <li>• 2</li> <li>• 3</li> <li>• 4</li> <li>• 5</li> <li>• 6</li> </ul>                                                                                                                                                                                                                                                                                | <ul style="list-style-type: none"> <li>• Farmacia comunitaria</li> <li>• Botiquín familiar</li> <li>• Farmacia familiar</li> <li>• Amigo o familiar</li> <li>• Otros</li> </ul>                                                                                    |
| 5. Tipo de medicamentos empleados en la automedicación                                                                                                                                                                                                                                                                                                                                                |                                                                                                                                                                                                                                                                    |
| <ul style="list-style-type: none"> <li>• Analgésicos</li> <li>• Antiácidos</li> <li>• Antigripales</li> <li>• Antihistamínicos</li> <li>• Ansiolíticos</li> <li>• Anticonceptivos</li> <li>• Antibióticos</li> <li>• Otros</li> </ul>                                                                                                                                                                 |                                                                                                                                                                                                                                                                    |
| 6. Tipo de enfermedades/síntomas que motivaron la automedicación                                                                                                                                                                                                                                                                                                                                      |                                                                                                                                                                                                                                                                    |
| <ul style="list-style-type: none"> <li>• Dolores de cabeza, menstrual, estomacal</li> <li>• Síntomas gripales, resfriado, fiebre, tos</li> <li>• Acidez, gastritis, trastornos digestivos</li> <li>• Alergias</li> <li>• Infecciones, inflamaciones</li> <li>• Prevención del embarazo</li> <li>• Desgana, decaimiento, agotamiento</li> <li>• Ansiedad, estrés, insomnio</li> <li>• Otros</li> </ul> |                                                                                                                                                                                                                                                                    |

---
